# Supplementary material for: A Parallel Comparison of Antigen Candidates for Development of an Optimized Serological Diagnosis of Schistosomiasis Japonica in the Philippines
Source: PubMed Central journal article supplement — eBioMedicine. 2017 Sep 17;24:237–46. doi: 10.1016/j.ebiom.2017.09.011 (PMC5652020; doi:10.1016/j.ebiom.2017.09.011), 2017-09-17
Supplement: mmc1.pdf [file mmc1.pdf]

# Supplementary Figures and Tables

**Supplementary Fig. 1.** Purification of the 10 *S. japonicum* (SjP strain) antigen candidates. (a) Purified recombinant proteins were resolved in 12% (w/v) SDS-PAGE. (b). Detection of the ten recombinant proteins by Western blotting with an anti-his-tag antibody.

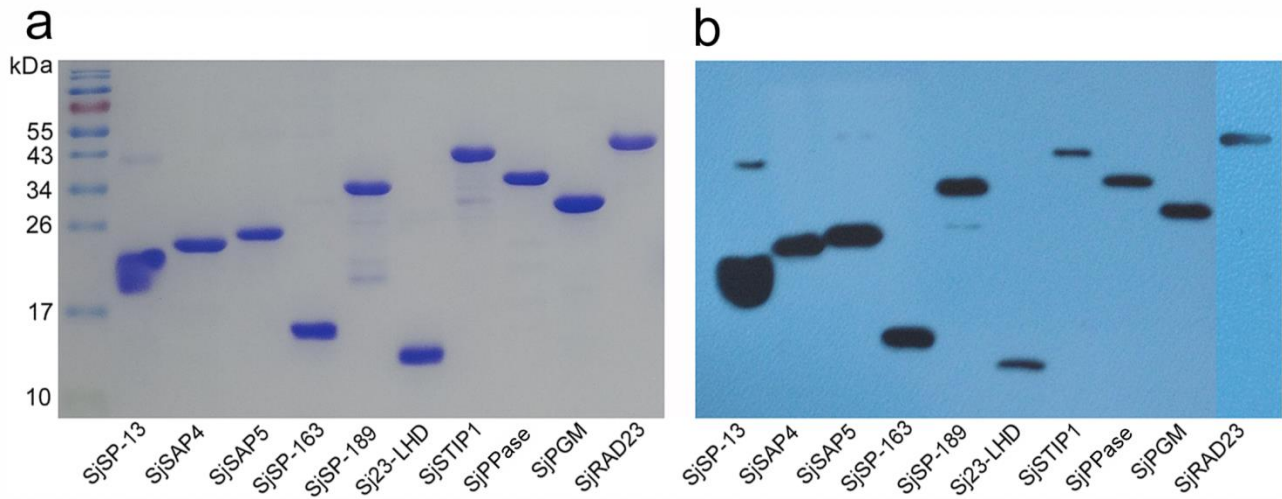

**Supplementary Fig. 2.** No significant difference was evident in the worm burden of the SjC- and SjP-infected BALB/c mice (Mann-Whitney test,  $P > 0.05$ ).

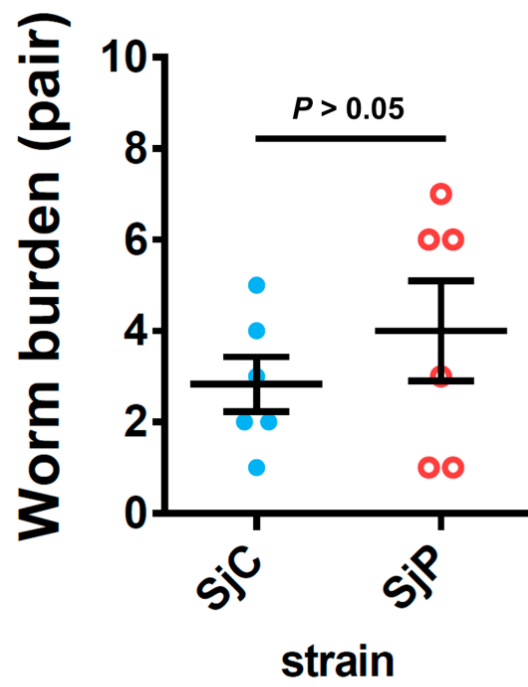

**Supplementary Table 1. Primers used in this study for molecular cloning.**

| Target gene | Forward (5'-3')                   | Reverse(5'-3')                            |
|-------------|-----------------------------------|-------------------------------------------|
| SjSP-13     | AAGGATCCCTTGAAAATTCTGTGTCACC      | CTGCTCGAGAATAGTGAATTGAACTAGAACTTC         |
| SjSAP4      | AAGGATCCGCAAACCACACTGAGTTGG       | CTGCTCGAGTAATGGACACAACGTATTG              |
| SjSAP5      | AAGGATCCTCAACATTGAACAGTAATAATTTAC | CTGCTCGAGTGCAAAAGGATATTTCAAAAGG           |
| SjSP-163    | CTGGATCCCAAACTCTAGTATTTTCGTTT     | ATAGTTTAGCGGCCGCGTAATATAATACAAAGATTAGTGTG |
| SjSP-189    | CTGGATCCTTCAAGTTGGTCAAAGAAAGAAG   | CTGCTCGAGTACCAATGTTATAATACTGAATAATCC      |
| Sj23        | CGGGATCCGTGTACAAGGATAAAAATCGATG   | CTGCTCGAGGTTGCGTTTTAAGAATGCAC             |
| SjTIP1      | CTGAATTCGGCCAACATGAAGCAGAAG       | ATAGTTTAGCGGCCGCCCCGGTACGAAATAAGACC       |
| SjPPase     | CGGGATCCTCGGTTGAACGTGGGACTT       | CTGCTCGAGAATATTCGTATTACAAAAATGCC          |
| SjPGM       | AAGGATCCGCTCCCTACAAAATTGTATTC     | CTGCTCGAGTTTCTTCTTCCTTGATTTCG             |
| SjRAD23     | AAGGATCCAAGGTTACTTTCAAAACACTG     | CTGCTCGAGTACCATTTTCATCATCTAAAC            |

**Supplementary Table 2.** IgG titer against the 10 antigen candidates in SjP-infected BALB/c mice at 7 weeks p.i.

| No. | SjSP-13           | SjSAP4            | SjSAP5            | SjSP-163          | SjSP-189          | Sj23-LHD          | SjSTIP1           | SjPPase           | SjGPM             | SjRAD23           | worm pairs | EPG     |
|-----|-------------------|-------------------|-------------------|-------------------|-------------------|-------------------|-------------------|-------------------|-------------------|-------------------|------------|---------|
| 1   | -                 | 1:10 <sup>4</sup> | 1:10 <sup>3</sup> | 1:10 <sup>2</sup> | 1:10 <sup>2</sup> | 1:10 <sup>5</sup> | -                 | -                 | -                 | -                 | 4          | 14043.9 |
| 2   | -                 | 1:10 <sup>4</sup> | 1:10 <sup>4</sup> | 1:10 <sup>2</sup> | 1:10 <sup>2</sup> | 1:10 <sup>5</sup> | 1:10 <sup>2</sup> | -                 | -                 | 1:10 <sup>2</sup> | 4          | 16280.7 |
| 3   | 1:10 <sup>2</sup> | 1:10 <sup>4</sup> | 1:10 <sup>4</sup> | -                 | 1:10 <sup>2</sup> | 1:10 <sup>5</sup> | -                 | -                 | -                 | 1:10 <sup>2</sup> | 5          | 19333.3 |
| 4   | -                 | 1:10 <sup>3</sup> | 1:10 <sup>3</sup> | -                 | -                 | 1:10 <sup>5</sup> | -                 | -                 | -                 | -                 | 3          | 19532.5 |
| 5   | 1:10 <sup>2</sup> | 1:10 <sup>4</sup> | 1:10 <sup>3</sup> | -                 | 1:10 <sup>3</sup> | 1:10 <sup>5</sup> | 1:10 <sup>2</sup> | -                 | -                 | -                 | 6          | 37006.8 |
| 6   | 1:10 <sup>2</sup> | 1:10 <sup>4</sup> | 1:10 <sup>4</sup> | 1:10 <sup>2</sup> | 1:10 <sup>3</sup> | 1:10 <sup>6</sup> | 1:10 <sup>2</sup> | 1:10 <sup>2</sup> | 1:10 <sup>2</sup> | 1:10 <sup>2</sup> | 8          | 32209.9 |
| 7   | -                 | 1:10 <sup>4</sup> | 1:10 <sup>4</sup> | 1:10 <sup>2</sup> | 1:10 <sup>2</sup> | 1:10 <sup>5</sup> | -                 | -                 | -                 | 1:10 <sup>2</sup> | 8          | 31992.0 |
| 8   | 1:10 <sup>2</sup> | 1:10 <sup>4</sup> | 1:10 <sup>4</sup> | -                 | 1:10 <sup>2</sup> | 1:10 <sup>5</sup> | 1:10 <sup>2</sup> | -                 | 1:10 <sup>2</sup> | 1:10 <sup>3</sup> | 10         | 42913.2 |
| 9   | -                 | 1:10 <sup>3</sup> | 1:10 <sup>4</sup> | -                 | 1:10 <sup>2</sup> | 1:10 <sup>5</sup> | -                 | -                 | -                 | -                 | 6          | 17361.7 |
| 10  | 1:10 <sup>2</sup> | 1:10 <sup>4</sup> | 1:10 <sup>3</sup> | 1:10 <sup>2</sup> | 1:10 <sup>3</sup> | 1:10 <sup>5</sup> | -                 | -                 | 1:10 <sup>2</sup> | 1:10 <sup>2</sup> | 9          | 36541.3 |

"-": negative at serum dilution of 1:10<sup>2</sup>

EPG: eggs per gram of faeces.

**Supplementary Table 3.** ddPCR positivity rate for stool and serum samples from the second patient cohort

| Total number of samples tested (n) | Number of ddPCR positives (%) |                     |
|------------------------------------|-------------------------------|---------------------|
|                                    | KK-Positive (n=108)           | KK-negative (n=304) |
| Stool (412)                        | 106 (98.15)                   | 201 (66.12)         |
| Serum (412)                        | 102 (94.44)                   | 175 (57.57)         |
